# Supplementary material for: Single-cell RNAseq and longitudinal proteomic analysis of a novel semi-spontaneous urothelial cancer model reveals tumor cell heterogeneity and pretumoral urine protein alterations
Source: PubMed Central journal article supplement (PMC8262791; doi:10.1371/journal.pone.0253178), 2021-07-07
Supplement: pone.0253178.s013.pdf [file pone.0253178.s013.pdf]

Loading order direction

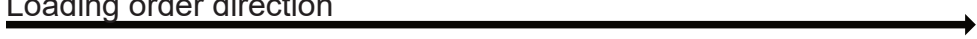

Without Hind III

With Hind III

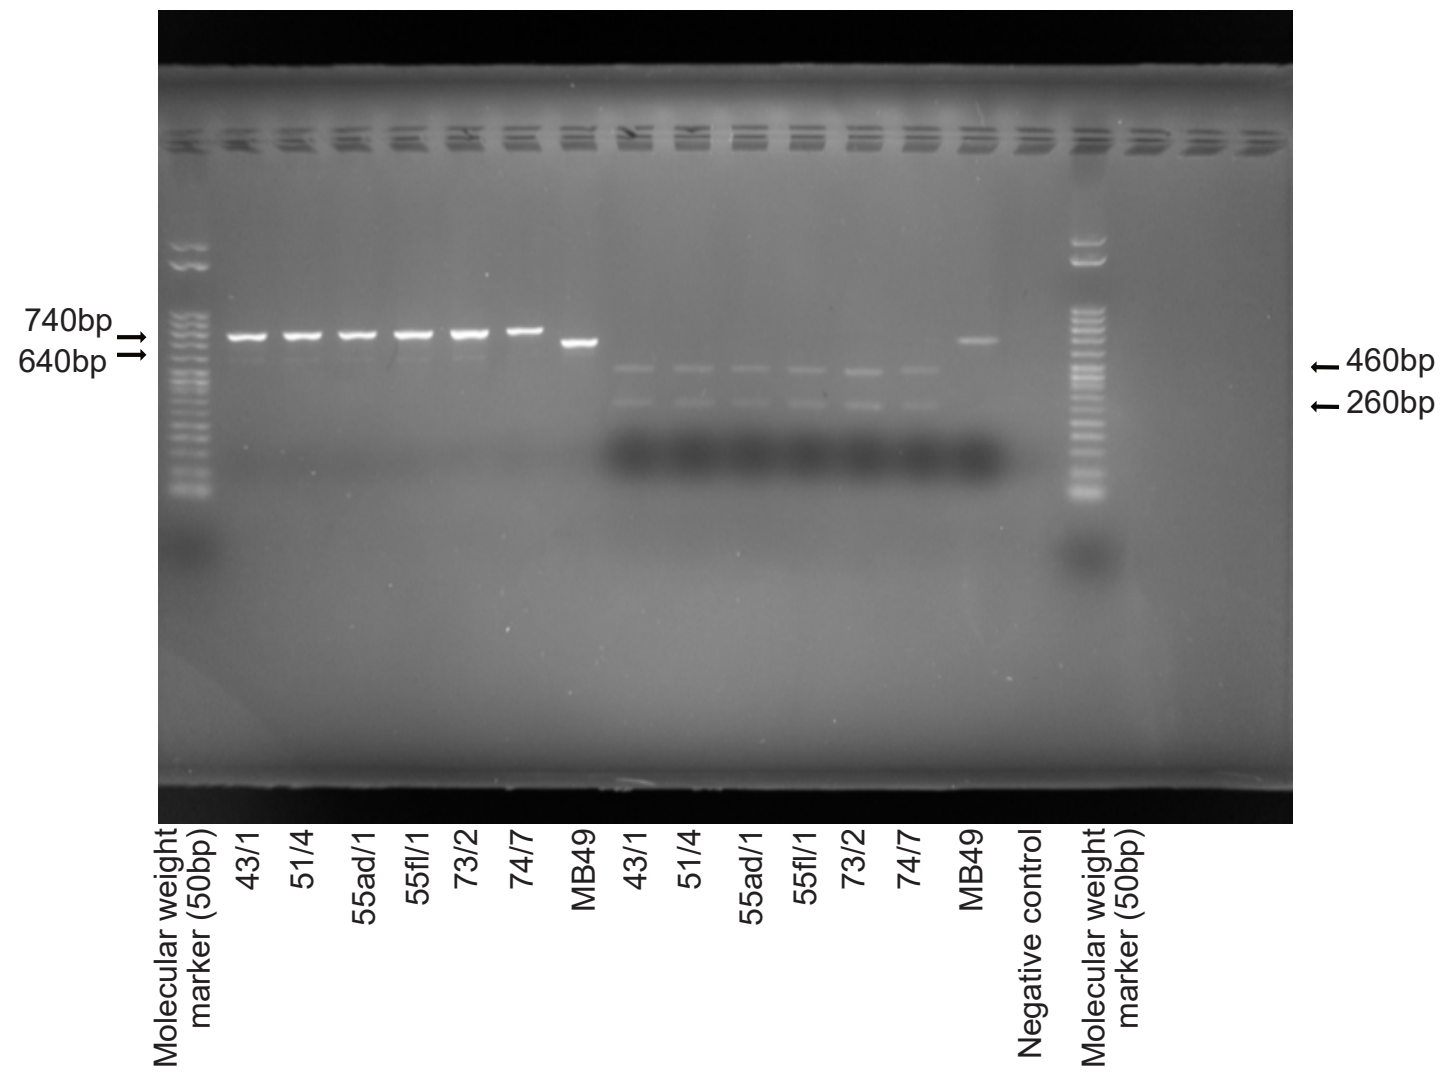

Raw gel image for S3 Fig. Captured on Gel Doc EZ Gel Documentation System (Bio Rad).
